# Supplementary material for: Capecitabine Plus Aromatase Inhibitor as First Line Therapy for Hormone Receptor Positive, HER2 Negative Metastatic Breast Cancer
Source: MDPI journal article supplement (doi:10.3390/curroncol30070454), 2023-06-24
Supplement: s1 [file s1]

**Table S1.** Toxic Effects by treatment group in patients with metastatic breast cancer patients. Grades of toxic effects were defined according to the Common Toxicity Criteria of the National Cancer Institute (version 5.0). XELIA: Capecitabine + Aromatase inhibitor; HT: Hormone Therapy (Aromatase Inhibitor); CTx: Chemotherapy (Capecitabine); AST = aspartate aminotransferase; ALT = alanine aminotransferase.

| Toxicity             | Grade 1<br>% (n) |          |          | Grade 2<br>% (n) |         |          | Grade 3<br>% (n) |        |        | Grade 4<br>% (n) |        |      | Grade 3+4<br>% (n) |        |        | All grade toxicities<br>% (n) |          |          | <i>p</i> -value |
|----------------------|------------------|----------|----------|------------------|---------|----------|------------------|--------|--------|------------------|--------|------|--------------------|--------|--------|-------------------------------|----------|----------|-----------------|
|                      | Xelia            | HT       | CTx      | Xelia            | HT      | CTx      | Xelia            | HT     | CTx    | Xelia            | HT     | CTx  | Xelia              | HT     | CTx    | Xelia                         | HT       | CTx      |                 |
| Leukopenia           | 45.3(43)         | 57.1(20) | 63.6(21) | 10.5(10)         | 0(0)    | 3.0(1)   | 2.1 (2)          | 2.9(1) | 3.0(1) | 0 (0)            | 0(0)   | 0(0) | 2.1 (2)            | 2.9(1) | 3.0(1) | 57.9(55)                      | 60.0(21) | 59.7(24) | 0.245           |
| Neutropenia          | 3.2(3)           | 2.9 (1)  | 3.0 (1)  | 10.5(10)         | 2.9 (1) | 3.0 (1)  | 10.5(10)         | 0(0)   | 0(0)   | 0(0)             | 0(0)   | 0(0) | 10.5(10)           | 0(0)   | 0(0)   | 16.0(15)                      | 5.8(2)   | 6.0(2)   | 0.547           |
| Lymphopenia          | 45.3(43)         | 42.9(15) | 36.4(12) | 16.8(16)         | 8.6(3)  | 30.3(10) | 9.5(9)           | 8.6(3) | 3.0(1) | 1.1(1)           | 0(0)   | 0(0) | 10.6(10)           | 8.6(3) | 3.0(1) | 72.6(69)                      | 60.0(21) | 69.7(23) | 0.394           |
| Anemia               | 17.9(17)         | 8.6(3)   | 27.3(9)  | 6.3(6)           | 0(0)    | 0(0)     | 2.1(2)           | 2.9(1) | 3.0(1) | 0(0)             | 0(0)   | 0(0) | 2.1(2)             | 2.9(1) | 3.0(1) | 26.3(30)                      | 11.4(4)  | 30.3(10) | 0.190           |
| Thrombocytopenia     | 17.9(17)         | 14.3(5)  | 15.2(5)  | 2.1(2)           | 2.9(1)  | 9.1(3)   | 1.1(1)           | 2.9(1) | 0(0)   | 1.1(1)           | 2.9(1) | 0(0) | 2.1(2)             | 5.8(2) | 0(0)   | 22.1(26)                      | 22.9(8)  | 24.3(8)  | 0.651           |
| Creatinine elevation | 3.2(3)           | 2.9(1)   | 3.0(1)   | 3.2(3)           | 2.9(1)  | 0(0)     | 2.1(2)           | 0(0)   | 0(0)   | 1.1(1)           | 2.9(1) | 0(0) | 3.2(3)             | 2.9(1) | 0(0)   | 9.5(9)                        | 8.6(3)   | 3.0(1)   | 0.878           |
| AST elevation        | 26.3(25)         | 31.4(11) | 18.2(6)  | 2.1(2)           | 0(0)    | 9.1(3)   | 1.1(1)           | 0(0)   | 0(0)   | 0(0)             | 0(0)   | 0(0) | 1.1(1)             | 0(0)   | 0(0)   | 29.5(28)                      | 31.4(11) | 27.3(9)  | 0.302           |
| ALT elevation        | 7.4(7)           | 20.0(7)  | 12.1(4)  | 2.1(2)           | 0(0)    | 3.0(1)   | 0(0)             | 0(0)   | 0(0)   | 0(0)             | 0(0)   | 0(0) | 0(0)               | 0(0)   | 0(0)   | 9.5(9)                        | 20.0(7)  | 15.1(5)  | 0.285           |
| Triglycerides        | 6.3(6)           | 5.7(2)   | 0(0)     | 7.4(7)           | 5.7(2)  | 0(0)     | 2.1(2)           | 2.9(1) | 3.0(1) | 0(0)             | 0(0)   | 0(0) | 2.1(2)             | 2.9(1) | 3.0(1) | 15.8(15)                      | 14.3(5)  | 3.0(1)   | 0.538           |
| Albumin              | 43.2(41)         | 37.1(13) | 42.4(14) | 12.6(12)         | 14.3(5) | 9.1(3)   | 2.1(2)           | 5.7(2) | 6.1(2) | 0(0)             | 0(0)   | 0(0) | 2.1(2)             | 5.7(2) | 6.1(2) | 57.9(55)                      | 57.1(20) | 57.6(19) | 0.903           |
| Bilirubin            | 10.5(10)         | 0(0)     | 9.1(3)   | 5.3(5)           | 5.7(2)  | 0(0)     | 0(0)             | 2.9(1) | 0(0)   | 0(0)             | 0(0)   | 0(0) | 0(0)               | 2.9(1) | 0(0)   | 15.8(15)                      | 8.6(3)   | 9.1(3)   | 0.147           |
| Hand / Foot syndrome | 12.6(12)         | 0(0)     | 21.2(7)  | 18.9(18)         | 0(0)    | 21.2(7)  | 3.2(3)           | 0(0)   | 3(1)   | 0(0)             | 0(0)   | 0(0) | 3.2(3)             | 0(0)   | 3(1)   | 34.7(33)                      | 0(0)     | 45.5(15) | <b>0.002</b>    |
| Diarrhea             | 8.4(8)           | 5.7(2)   | 12.1(4)  | 9.5 (9)          | 0(0)    | 6.1(2)   | 0(0)             | 0(0)   | 0(0)   | 0(0)             | 0(0)   | 0(0) | 0(0)               | 0(0)   | 0(0)   | 17.9(17)                      | 5.7(2)   | 18.2(6)  | 0.315           |
| Nausea/Vomiting      | 31.6(30)         | 17.1(6)  | 39.4(13) | 7.4(7)           | 11.4(4) | 9.1(3)   | 1.1(1)           | 0(0)   | 0(0)   | 0(0)             | 0(0)   | 0(0) | 1.1(1)             | 0(0)   | 0(0)   | 40.0(48)                      | 28.6(10) | 48.5(16) | 0.503           |
| Mucositis            | 3.2(3)           | 0(0)     | 0(0)     | 1.1(1)           | 0(0)    | 0(0)     | 0(0)             | 0(0)   | 0(0)   | 0(0)             | 0(0)   | 0(0) | 0(0)               | 0(0)   | 0(0)   | 4.3(4)                        | 0(0)     | 0(0)     | 0.569           |
